# Supplementary material for: Multi-Omics and Machine Learning Integration of Diverse Cell Death Pathways Optimize Risk Stratification and Inform Drug Therapy in Wilms Tumor
Source: Research Square preprint supplement (doi:10.21203/rs.3.rs-8630234/v1), 2026-02-13
Supplement: Supplementary file 1 [file c6fa657b0164a2fe9687eded.xlsx]

## Sheet: Sheet1
No.	Apoptosis	Pyroptosis	Ferroptosis	Autophagy	Necroptosis	Cuproptosis	Parthanatos	Entotic cell death	Netotic cell death	Lysosome-dependent cell death	Alkaliptosis	Oxeiptosis
1	AATF	BAK1	ABCC1	ABL1	GLUD1	FDX1	PARP	AMPK	ELANE	ABCA2	IKBKB	PGAM5
2	ABL1	BAX	ACACA	ABL2	GLUD2	LIAS	MIF	ATG5	MMP1	ABCB9	NFKB1	KEAP1
3	ACAA2	CASP1	ACO1	ACER2	ALOX15	LIPT1	AIFM1	ATG7	MPO	ACP2	CA9	AIFM1
4	ACKR3	CASP3	ACSF2	ADRA1A	FTH1	DLD	HSP70	BECN1	CAMP	ACP5	CHUK	NRF2
5	ACVR1	CASP4	ACSL1	ADRB2	PYG	DLAT	PAAN	CDC42	PADI4	ADGRE2	IKBKG	AIRE
6	ACVR1B	CASP5	ACSL3	AKT1	CAPN1	PDHA1	ARH3	CDH1	EIPA	AGA	NFKB1A
7	ADORA1	CASP6	ACSL4	AMBRA1	CASP1	PDHB	RNF146	CTNNA1	NCX1	AP1B1	RELA
8	AEN	CASP8	ACSL5	ATF6	GLNA	MTF1	ADPRHL2	CYBB	MIA	AP1G1
9	AGT	CASP9	ACSL6	ATG101	BAX	GLS	OGG1	MYH14		AP1M1
10	AGTR2	CHMP2A	AIFM2	ATG13	BCL2	CDKN2A		PI3KC3		AP1M2
11	AIFM1	CHMP2B	AKR1C1	ATG14	FADD	GCSH		RHOA		AP1S1
12	AKT1	CHMP3	AKR1C2	ATG2A	RIPK1	ATP7A		RNF146		AP1S2
13	ANXA6	CHMP4A	AKR1C3	ATG2B	TNF	ATP7B		ROCK		AP1S3
14	APAF1	CHMP4B	AKT1	ATG5	TNFRSF1A	SLC31A1		RUBCN		AP3B1
15	APPL1	CHMP4C	ALOX12	ATG7	TRADD	HMGB1		UVRAG		AP3B2
16	AR	CHMP6	ALOX15	ATM	TRAF2					AP3D1
17	ARHGEF2	CHMP7	ALOX5	ATP13A2	PPIA					AP3M1
18	ARL6IP5	CYCS	ATG5	ATP6V0A1	CAPN2					AP3M2
19	ARMC10	ELANE	ATG7	ATP6V0A2	HSP90A					AP3S1
20	ARRB2	GPX4	ATP5MC3	ATP6V0B	IL1A					AP3S2
21	ASAH2	GSDMB	BACH1	ATP6V0C	TNFSF6					AP4B1
22	ATF3	GSDMC	CARS	ATP6V0D1	TNFRSF6					AP4E1
23	ATF4	GSDMD	CBS	ATP6V0D2	CASP8					AP4M1
24	ATM	GSDME	CD44	ATP6V0E1	JNK					AP4S1
25	ATP2A1	GZMB	CDKN1A	ATP6V0E2	JAK2					ARF1
26	ATP2A3	HMGB1	CHAC1	ATP6V1A	CAMK2					ARL8B
27	ATP5IF1	IL18	CISD1	ATP6V1B1	IL1B					ARSA
28	AVP	IL1A	CP	ATP6V1B2	IFNG					ARSB
29	BAD	IL1B	CRYAB	ATP6V1C1	STAT3					ARSG
30	BAG3	IRF1	CS	ATP6V1C2	IRF9					ASAH1
31	BAG5	IRF2	CYBB	ATP6V1D	TNFSF10					ATP10B
32	BAG6	NLRC4	DPP4	ATP6V1E1	TNFRSF10A					ATP13A2
33	BAK1	NLRP1	EMC2	ATP6V1E2	TNFRSF10B					ATP6AP1
34	BAX	NLRP2	FADS2	ATP6V1G1	CFLAR					ATP6V0A1
35	BBC3	NLRP3	FANCD2	ATP6V1G2	XIAP					ATP6V0A2
36	BCAP31	NLRP6	FDFT1	ATP6V1H	BID					ATP6V0A4
37	BCL10	NLRP7	FTH1	AUP1	AIFM1					ATP6V0B
38	BCL2	NOD1	FTL	BAD	TRPM7					ATP6V0C
39	BCL2A1	PLCG1	FTMT	BAG3	IFNAR1					ATP6V0D1
40	BCL2L1	PJVK	G6PD	BCL2	IFNAR2					ATP6V0D2
41	BCL2L10	PRKACA	GCLC	BCL2L11	IFNGR1					ATP6V1H
42	BCL2L11	PYCARD	GCLM	BECN1	IFNGR2					BLK
43	BCL2L12	SCAF11	GLS2	BMF	TLR3					BLOC1S1
44	BCL2L14	TINAP	GOT1	BNIP3	TIRP					BLOC1S2
45	BCL2L2	TNF	GPX4	BNIP3L	IFNA					BORCS5
46	BCL3	TP53	GSS	BOK	IFNB					BORCS6
47	BCLAF1	TP63	HMGCR	C9orf72	TRIF					BTK
48	BDKRB2	AIM2	HMOX1	CALCOCO2	VDAC1					C12orf4
49	BDNF	GSDMA	HSBP1	CAMKK2	SLC25A4S					CBL
50	BECN1	IL6	HSPA5	CAPN1	PPID					CD164
51	BID	NOD2	HSPB1	CAPNS1	CYLD					CD300A
52	BIK	TIRAP	IREB2	CASP1	RIPK3					CD63
53	BIRC6		KEAP1	CASP3	MLKL					CD68
54	BLOC1S2		LPCAT3	CDC37	TRAF5					CD84
55	BMF		MAP1LC3A	CDK5	TLR4					CHGA
56	BMP4		MAP1LC3B	CDK5R1	RBCK1					CLN3
57	BMP5		MAP1LC3C	CHMP4A	HMGB1					CLN5
58	BMPR1B		MT1G	CHMP4B	JAK1					CLNK
59	BNIP3		NCOA4	CISD2	JAK3					CLTA
60	BNIP3L		NFE2L2	CLEC16A	TYK2					CLTB
61	BOK		NFS1	CLN3	STAT1					CLTC
62	BRCA1		NOX1	CLU	STAT2					CLTCL1
63	BRCA2		NQO1	CPTP	STAT4					CLU
64	BRSK2		NRF2	CSNK2A2	STAT5A					CPLX2
65	BTK		OTUB1	CTSA	STAT5B					CTNS
66	CAAP1		PCBP1	CTTN	STAT6					CTSA
67	CASP1		PCBP2	DAP	H2A					CTSB
68	CASP10		PEBP1	DAPK1	TNFAIP3					CTSC
69	CASP12		PGD	DAPK2	RNF31					CTSD
70	CASP2		PHKG2	DAPK3	CHMP2A					CTSE
71	CASP3		PRDX3	DAPL1	CHMP2B					CTSF
72	CASP4		PRNP	DCN	VPS24					CTSG
73	CASP5		PROM2	DDIT3	CHMP4A					CTSH
74	CASP8		PTGS2	DDRGK1	CHMP4B					CTSK
75	CASP8AP2		RPL8	DEPDC5	CHMP6					CTSL
76	CASP9		SAT1	DEPP1	VPS4					CTSO
77	CAV1		SAT2	DHRSX	CHMP1					CTSS
78	CCAR2		SLC11A2	DNM1L	CHMP5					CTSV
79	CCK		SLC1A5	DRAM1	SMPD1					CTSW
80	CD14		SLC39A14	DRAM2	PYCARD					CTSZ
81	CD24		SLC39A8	EEF1A1	NLRP3					DEF8
82	CD27		SLC3A2	EEF1A2	ZBP1					DNASE2
83	CD28		SLC40A1	EIF2AK4	IL33					DNASE2B
84	CD38		SLC7A11	EIF4G1	FTL					ENTPD4
85	CD3E		SQLE	EIF4G2	SQSTM1					FAM98A
86	CD44		STEAP3	ELAPOR1	VDAC2					FER
87	CD5		TF	EP300	VDAC3					FES
88	CD70		TFRC	EPM2A	CHMP7					FGR
89	CD74		TP53	ERCC4	PGAM5					FLCN
90	CDIP1		VDAC2	ERN1	BIRC2					FOXF1
91	CDKN1A		VDAC3	EXOC1	BIRC3					FTH1
92	CDKN2D		ZEB1	EXOC4	EIF2AK2					FTL
93	CEBPB			EXOC7	PLA2G4					FUCA1
94	CFLAR			EXOC8	DNM1L					GAA
95	CHAC1			FBXL2	SPATA2					GAB2
96	CHCHD10			FBXO7	FAF1					GALC
97	CHEK2			FBXW7	SHARPIN					GALNS
98	CIB1			FEZ1	NOX2					GATA2
99	CIDEB			FEZ2	USP21					GBA
100	CLU			FLCN	PARP1					GCC2
101	COA8			FOXK1	CHMP4C					GGA1
102	COL2A1			FOXK2						GGA2
103	CRADD			FOXO1						GGA3
104	CREB3			FOXO3						GLA
105	CREB3L1			FTH1						GLB1
106	CRH			FTL						GM2A
107	CRIP1			FYCO1						GNPTAB
108	CSF2			FZD5						GNPTG
109	CSNK2A1			GAPDH						GNS
110	CSNK2A2			GATA4						GUSB
111	CTH			GBA						HDAC6
112	CTNNA1			GFAP						HEXA
113	CTSC			GNAI3						HEXB
114	CTTN			GOLGA2						HGS
115	CUL1			GPR137						HGSNAT
116	CUL2			GPR137B						HMOX1
117	CUL3			GPSM1						HPS6
118	CUL4A			GSK3A						HSPA8
119	CUL5			GSK3B						HYAL1
120	CX3CL1			HAX1						IDS
121	CX3CR1			HDAC6						IDUA
122	CXCL12			HERC1						IGF2R
123	CYLD			HGF						IL13
124	CYP1B1			HIF1A						IL13RA2
125	DAB2IP			HMGB1						IL4
126	DAP			HMOX1						IL4R
127	DAP3			HSP90AA1						KIF1B
128	DAPK1			HSPA8						KIT
129	DAPK2			HSPB1						KXD1
130	DAPK3			HSPB8						LAMP1
131	DAPL1			HTR2B						LAMP2
132	DAXX			HTRA2						LAMP3
133	DBH			HTT						LAMTOR1
134	DCC			HUWE1						LAPTM4A
135	DDIAS			IFI16						LAPTM4B
136	DDIT3			IFNG						LAPTM5
137	DDIT4			IKBKG						LAT
138	DDX3X			IL10						LAT2
139	DDX47			IL10RA						LGALS9
140	DDX5			IL4						LGMN
141	DEDD			IRGM						LIPA
142	DEDD2			ITPR1						LRRK2
143	DELE1			KAT5						LYN
144	DEPTOR			KAT8						M6PR
145	DIABLO			KDM4A						MAN2B1
146	DIDO1			KDR						MANBA
147	DNAJA1			KEAP1						MAP1LC3A
148	DNAJC10			KIF25						MAP6
149	DNM1L			KLHL22						MCOLN1
150	DPF2			KLHL3						MFSD8
151	DYRK2			LACRT						MILR1
152	E2F1			LAMP1						MRGPRX2
153	E2F2			LAMP2						MT3
154	EDA2R			LAMP3						MYH9
155	EIF2AK3			LAMTOR1						NAGA
156	ELL3			LAMTOR2						NAGLU
157	ENO1			LAMTOR3						NAGPA
158	EP300			LAMTOR4						NAPSA
159	EPHA2			LAMTOR5						NCOA4
160	EPO			LARP1						NDEL1
161	ERBB3			LEP						NEDD4
162	ERCC6			LEPR						NEU1
163	ERN1			LGALS8						NPC1
164	ERN2			LRRK2						NPC2
165	ERO1A			LRSAM1						NR4A3
166	ERP29			LZTS1						PDPK1
167	EYA1			MAP1LC3A						PIK3C3
168	EYA2			MAP1LC3B						PIK3CD
169	EYA3			MAP1LC3C						PIK3CG
170	EYA4			MAP3K7						PIP4K2A
171	FADD			MAPK15						PIP4K2B
172	FAF1			MAPK3						PIP4P1
173	FAIM			MAPK8						PLA2G15
174	FAIM2			MAPT						PLA2G3
175	FAM162A			MCL1						PLEKHM1
176	FAS			MEFV						PLEKHM2
177	FASLG			MET						PPT1
178	FASTK			MFN2						PPT2
179	FBH1			MFSD8						PSAP
180	FBXW7			MID2						PSAPL1
181	FEM1B			MIR199A1						PTGDR
182	FGA			MIRLET7B						PTGDS
183	FGB			MLST8						RAB34
184	FGF10			MT3						RAB3A
185	FGFR1			MTCL1						RAB7A
186	FGFR3			MTDH						RAC2
187	FGG			MTM1						RUBCNL
188	FHIT			MTMR3						S100A13
189	FIGNL1			MTMR4						SCARB2
190	FIS1			MTMR8						SGSH
191	FNIP2			MTMR9						SLC11A1
192	FXN			MTOR						SLC11A2
193	FYN			NCOA4						SLC17A5
194	FZD9			NEDD4						SMPD1
195	G0S2			NLRP6						SNAP23
196	GABARAP			NOD1						SNAPIN
197	GATA1			NOD2						SNX16
198	GATA4			NPC1						SNX4
199	GCLM			NPRL2						SORL1
200	GDNF			NRBP2						SORT1
201	GFRAL			NUPR1						SPAG9
202	GGCT			OPTN						SPHK2
203	GHITM			ORMDL3						SQSTM1
204	GNAI2			OSBPL7						STXBP1
205	GNAI3			PAFAH1B2						STXBP2
206	GPER1			PARK7						SUMF1
207	GPX1			PHB2						SYK
208	GRINA			PHF23						SYTL4
209	GSDME			PIK3C2A						TCIRG1
210	GSK3A			PIK3C3						TFEB
211	GSK3B			PIK3CA						TMEM106B
212	GSKIP			PIK3CB						TPP1
213	GSTP1			PIK3R2						UNC13D
214	GZMB			PIM2						VAMP7
215	HDAC1			PINK1						VAMP8
216	HERPUD1			PIP4K2A						VPS33A
217	HGF			PIP4K2B						VPS33B
218	HIC1			PIP4K2C						VPS4A
219	HIF1A			PJVK						WASH3P
220	HINT1			PLEKHF1						ZFYVE16
221	HIP1			PLK2
222	HIP1R			PLK3
223	HIPK1			POLDIP2
224	HIPK2			PRKAA1
225	HMGB2			PRKAA2
226	HMOX1			PRKAB1
227	HNRNPK			PRKAB2
228	HRAS			PRKACA
229	HRK			PRKAG1
230	HSPA1A			PRKAG2
231	HSPA1B			PRKAG3
232	HSPB1			PRKD1
233	HTRA2			PRKN
234	HTT			PSAP
235	HYAL2			PTPN22
236	HYOU1			PYCARD
237	ICAM1			QSOX1
238	IFI16			RAB39B
239	IFI27			RAB3GAP1
240	IFI27L1			RAB3GAP2
241	IFI27L2			RAB7A
242	IFI6			RAB8A
243	IFNB1			RALB
244	IFNG			RASIP1
245	IGF1			RB1CC1
246	IKBKE			RETREG1
247	IL12A			RETREG3
248	IL19			RHEB
249	IL1A			RIPK2
250	IL1B			RMC1
251	IL2			RNF152
252	IL20RA			RNF41
253	IL33			RNF5
254	IL4			ROCK1
255	IL6R			RPTOR
256	IL7			RRAGA
257	INCA1			RRAGB
258	ING2			RRAGC
259	ING5			RRAGD
260	INHBA			RUBCN
261	INHBB			RUFY4
262	INS			SCFD1
263	ITGA6			SCOC
264	ITGAM			SEC22B
265	ITGAV			SESN1
266	ITM2C			SESN2
267	ITPR1			SESN3
268	ITPRIP			SH3BP4
269	IVNS1ABP			SH3GLB1
270	JAK2			SIRT1
271	JMY			SIRT2
272	JUN			SLC38A9
273	KDM1A			SMCR8
274	KITLG			SMG1
275	KRT18			SNCA
276	KRT8			SNRNP70
277	LCK			SNX32
278	LGALS12			SNX5
279	LGALS3			SNX6
280	LRRK2			SOGA1
281	LTBR			SOGA3
282	LY96			SPTLC1
283	MADD			SPTLC2
284	MAEL			SQSTM1
285	MAGEA3			SREBF1
286	MAP2K5			SREBF2
287	MAP3K5			STAT3
288	MAPK7			STBD1
289	MAPK8			STING1
290	MAPK8IP1			STK11
291	MAPK8IP2			STUB1
292	MAPK9			SUPT5H
293	MARCHF7			SVIP
294	MAZ			SYNPO2
295	MCL1			TAB2
296	MDM2			TAB3
297	MELK			TBC1D14
298	MFF			TBC1D25
299	MIF			TBK1
300	MIR132			TEX264
301	MIR15A			TFEB
302	MIR16-1			TICAM1
303	MIR17			TIGAR
304	MIR198			TLK2
305	MIR21			TMEM150A
306	MIR210			TMEM150B
307	MIR221			TMEM150C
308	MIR222			TMEM39A
309	MIR26B			TMEM39B
310	MIR27B			TMEM59
311	MIR449A			TOMM7
312	MKNK2			TP53
313	MLH1			TP53INP1
314	MLLT11			TP53INP2
315	MMP9			TPCN1
316	MNT			TPCN2
317	MOAP1			TREM2
318	MPV17L			TRIB3
319	MSH2			TRIM13
320	MSH6			TRIM14
321	MSX1			TRIM21
322	MUC1			TRIM22
323	MUL1			TRIM27
324	MYBBP1A			TRIM34
325	NACC2			TRIM38
326	NANOS3			TRIM5
327	NBN			TRIM6
328	NCK1			TRIM65
329	NCK2			TRIM68
330	NDUFA13			TRIM8
331	NDUFS3			TRIML1
332	NFATC4			TRIML2
333	NFE2L2			TSC1
334	NGF			TSC2
335	NGFR			TSPO
336	NKX3-1			UBA5
337	NLE1			UBQLN1
338	NME5			UBQLN2
339	NMT1			UBQLN4
340	NOC2L			UCHL1
341	NOG			UFC1
342	NOL3			UFL1
343	NONO			UFM1
344	NOS3			ULK1
345	NOX1			USP10
346	NR4A2			USP13
347	NUPR1			USP30
348	OPA1			USP33
349	P2RX4			USP36
350	P2RX7			UVRAG
351	P4HB			VDAC1
352	PAK2			VPS13C
353	PAK5			VPS13D
354	PARK7			VPS26A
355	PARP1			VPS26B
356	PARP2			VPS35
357	PAWR			WAC
358	PCGF2			WASHC1
359	PDCD10			WDFY3
360	PDCD5			WDR24
361	PDCD6			WDR41
362	PDIA3			WDR6
363	PDK1			WDR81
364	PDK2			WIPI2
365	PDPK1			ZC3H12A
366	PDX1			ZKSCAN3
367	PEA15			ZMPSTE24
368	PELI3
369	PERP
370	PF4
371	PHIP
372	PHLDA3
373	PIAS4
374	PIDD1
375	PIH1D1
376	PIK3R1
377	PINK1
378	PLAGL2
379	PLAUR
380	PLEKHF1
381	PLSCR3
382	PMAIP1
383	PML
384	POLB
385	POU4F1
386	POU4F2
387	PPARD
388	PPIA
389	PPIF
390	PPM1F
391	PPP1CA
392	PPP1R13B
393	PPP1R15A
394	PPP2R1B
395	PPP3CC
396	PPP3R1
397	PRDX2
398	PRELID1
399	PRKCA
400	PRKCD
401	PRKDC
402	PRKN
403	PRKRA
404	PRODH
405	PSEN1
406	PSMD10
407	PSME3
408	PTEN
409	PTGIS
410	PTH
411	PTPMT1
412	PTPN1
413	PTPN2
414	PTPRC
415	PTTG1IP
416	PYCARD
417	QARS1
418	RACK1
419	RAF1
420	RB1
421	RB1CC1
422	RBCK1
423	RELA
424	RET
425	RFFL
426	RHOT1
427	RHOT2
428	RIPK1
429	RIPK3
430	RNF183
431	RNF186
432	RNF34
433	RNF41
434	RPL11
435	RPL26
436	RPS27L
437	RPS3
438	RPS6KB1
439	RPS7
440	RRP8
441	RTKN2
442	RTL10
443	S100A8
444	S100A9
445	SCG2
446	SCN2A
447	SCRT2
448	SELENOK
449	SELENOS
450	SENP1
451	SEPTIN4
452	SERINC3
453	SERPINE1
454	SFN
455	SFPQ
456	SFRP1
457	SFRP2
458	SGMS1
459	SGPL1
460	SGPP1
461	SH3RF1
462	SHH
463	SHISA5
464	SIAH1
465	SIAH2
466	SIRT1
467	SIVA1
468	SKIL
469	SLC25A5
470	SLC35F6
471	SLC9A3R1
472	SMAD3
473	SNAI1
474	SNAI2
475	SNW1
476	SOD1
477	SOD2
478	SORT1
479	SP100
480	SRC
481	SRPX
482	SST
483	SSTR3
484	ST20
485	STK11
486	STK24
487	STK25
488	STK3
489	STK4
490	STRADB
491	STX4
492	STYXL1
493	SYVN1
494	TAF9
495	TAF9B
496	TCF7L2
497	TERT
498	TFDP1
499	TFDP2
500	TFPT
501	TGFB1
502	TGFB2
503	TGFBR1
504	THBS1
505	TICAM1
506	TICAM2
507	TIMM50
508	TIMP3
509	TLR3
510	TLR4
511	TM2D1
512	TMBIM1
513	TMBIM6
514	TMC8
515	TMEM102
516	TMEM109
517	TMEM117
518	TMEM14A
519	TMEM161A
520	TNF
521	TNFAIP3
522	TNFRSF10A
523	TNFRSF10B
524	TNFRSF10C
525	TNFRSF12A
526	TNFRSF1A
527	TNFRSF1B
528	TNFRSF25
529	TNFSF10
530	TNFSF12
531	TOPORS
532	TP53
533	TP53BP2
534	TP63
535	TP73
536	TPD52L1
537	TPT1
538	TRADD
539	TRAF1
540	TRAF2
541	TRAF7
542	TRAP1
543	TRIAP1
544	TRIB3
545	TRIM32
546	TRIM39
547	TXNDC12
548	TYROBP
549	UACA
550	UBB
551	UBE2K
552	UBE4B
553	UBQLN1
554	UMOD
555	UNC5B
556	URI1
557	USP28
558	USP47
559	VDAC2
560	VNN1
561	WDR35
562	WNT4
563	WWOX
564	XBP1
565	YAP1
566	YBX3
567	YWHAB
568	YWHAE
569	YWHAG
570	YWHAH
571	YWHAQ
572	YWHAZ
573	ZC3HC1
574	ZDHHC3
575	ZMYND11
576	ZNF205
577	ZNF385A
578	ZNF385B
579	ZNF622
580	ZSWIM2
